# Supplementary material for: Nitrogen and oxygen Co-doped porous carbon derived from yam waste for high-performance supercapacitors
Source: Royal Society of Chemistry journal article supplement (doi:10.1039/d1ra06154b), 2021-01-01
Supplement: d1ra06154b1.pdf [file d1ra06154b1.pdf]

*Supplementary Information*

**Nitrogen and Oxygen Co-doped Porous Carbon Derived from Waste Yam  
for High-Performance Supercapacitors**

*Zhaojin Li<sup>†</sup>, Qian Liu<sup>†</sup>, Lizhi Sun<sup>†</sup>, Ning Li<sup>‡</sup>, Xiaofeng Wang<sup>‡</sup>, Qiujun Wang<sup>†</sup>, Di Zhang<sup>†,\*</sup>, Bo  
Wang<sup>†,\*</sup>*

<sup>†</sup> Hebei Key Laboratory of Flexible Functional Materials, School of Materials Science and  
Engineering, Hebei University of Science and Technology, Hebei 050018 (China)

<sup>‡</sup> Shenzhou Engineering Plastics Company Limited, Boling East Road 106, Shenzhou Economic  
Development Zone, Hebei 053800 (China)

\* Author to whom correspondence should be addressed: School of Materials Science and  
Engineering, Hebei University of Science and Technology, Hebei 050018 (China)

E-mail addresses: [wangbo1996@gmail.com](mailto:wangbo1996@gmail.com), [zd1210207@163.com](mailto:zd1210207@163.com)

**Table S1.** The organic element contents in the YPC-4 sample.

| <b>YPC-4</b>       |         |         |         |         |
|--------------------|---------|---------|---------|---------|
| Elemental analysis | C (wt%) | H (wt%) | N (wt%) | O (wt%) |
|                    | 44.89   | 2.83    | 0.33    | 46.42   |

| YPC-4              |         |          |
|--------------------|---------|----------|
| Elemental analysis | K (wt%) | Al (wt%) |
|                    | 1.8     | 3.5      |

**Table S2.** The mass content of ash in the YPC-4 sample.

**Table S3.** Comparison of the capacitive performance of carbon materials in the literatures.

| Materials             | Activating Agent  | Specific Surface                       |                                     | Current Density       | Specific Capacitance (F·g <sup>-1</sup> ) | Ref. No. |
|-----------------------|-------------------|----------------------------------------|-------------------------------------|-----------------------|-------------------------------------------|----------|
|                       |                   | Area (m <sup>2</sup> g <sup>-1</sup> ) | Electrolyte                         |                       |                                           |          |
| Tea-waste             | KOH               | 1610                                   | 6 M KOH                             | 1 A g <sup>-1</sup>   | 332                                       | 1        |
| Loofah sponge         | KOH               | 2718                                   | 6 M KOH                             | 1 A g <sup>-1</sup>   | 309.6                                     | 2        |
| Coconut shell         | ZnCl <sub>2</sub> | 1874                                   | 6 M KOH                             | 1 A g <sup>-1</sup>   | 268                                       | 3        |
| Oil Palm Kernel Shell | KOH               | 730                                    | 6 M KOH                             | 0.5A g <sup>-1</sup>  | 57.3                                      | 4        |
| Tree bark             | nano-ZnO          | 1511.91                                | 6 M KOH                             | 0.5 A g <sup>-1</sup> | 286                                       | 5        |
| Soybean               | KOH               | 1749                                   | 6 M KOH                             | 0.5 A g <sup>-1</sup> | 243.2                                     | 6        |
| Albizia flowers       | KOH               | 2757.63                                | 6 M KOH                             | 0.5 A g <sup>-1</sup> | 406                                       | 7        |
| Cicada slough         | KOH               | 1676                                   | 6 M KOH                             | 1 A g <sup>-1</sup>   | 355                                       | 8        |
| Elm samara            | KOH               | 1947                                   | 6 M KOH                             | 1 A g <sup>-1</sup>   | 470                                       | 9        |
| straw                 | KOH               | 1122                                   | 6 M KOH                             | 1 A g <sup>-1</sup>   | 337                                       | 10       |
| Starch                | MgO               | 2300                                   | 6 M KOH                             | 1 A g <sup>-1</sup>   | 229                                       | 11       |
| Waste potato peel     | KOH               | 1911.5                                 | 1 M Na <sub>2</sub> SO <sub>4</sub> | 1 A g <sup>-1</sup>   | 323                                       | 12       |
| Rotten potatoes       | KOH               | 960                                    | 6 M KOH                             | 1 A g <sup>-1</sup>   | 269                                       | 13       |
| This work             | KOH               | 2382                                   | 6 M KOH                             | 0.5 A g <sup>-1</sup> | 423                                       | -        |

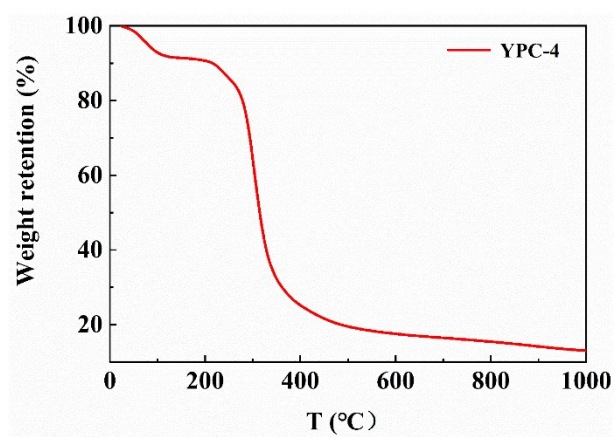

**Figure S1.** Thermogravimetric curve of YPC-4 sample.

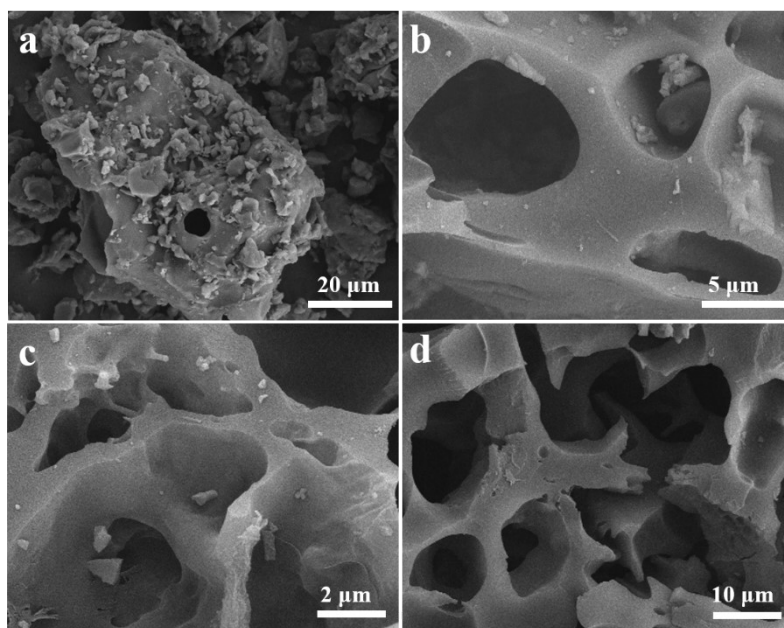

**Figure S2.** Morphology of the samples before and after activation. (a) SEM image of the YPC-4 sample before activation; (b) SEM image of the YPC-2 sample after activation; (c) SEM image of the YPC-3 sample after activation; (d) SEM image of the YPC-5 sample after activation.

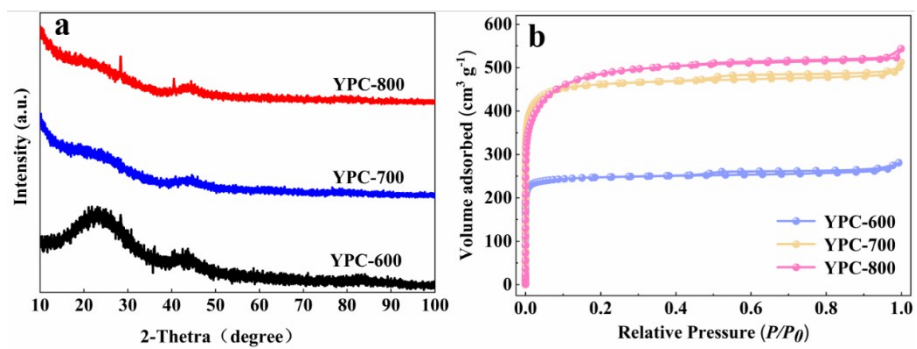

**Figure S3.** (a) XRD patterns and (b) N<sub>2</sub> adsorption-desorption isotherms of the YPC-600, YPC-700, and YPC-800 samples.

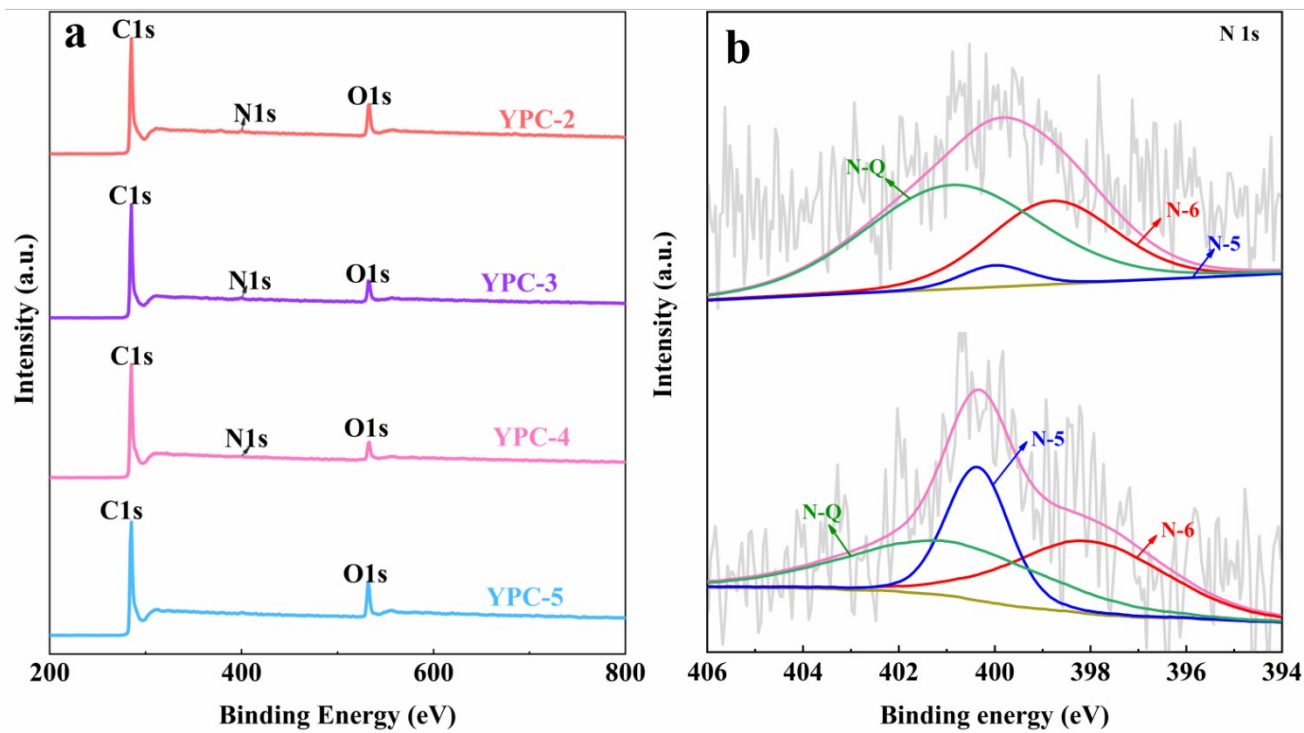

**Figure S4.** XPS spectra of (a) the YPC-2, YPC-3, YPC-4, and YPC-5 samples and (b) N 1s for YPC-2, YPC-3 samples.



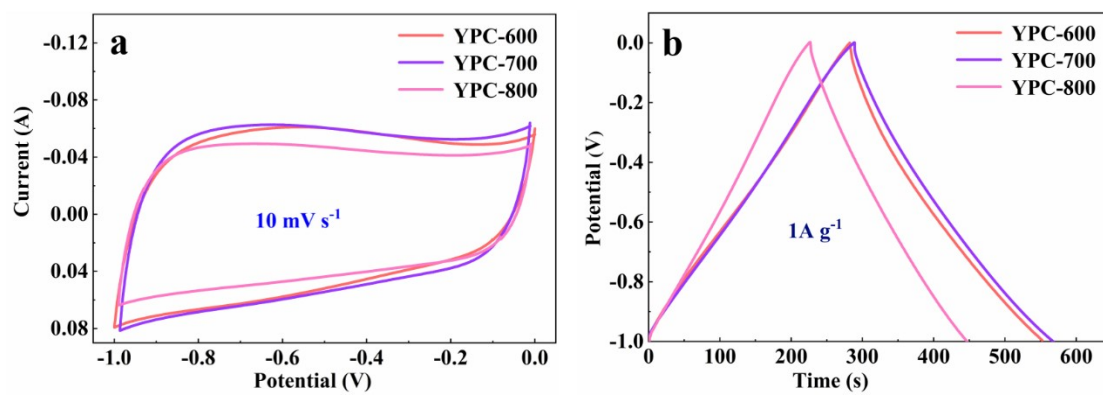

**Figure S5.** Electrochemical performance of the YPC-600, YPC-700 and YPC-800 samples in three-electrode system. (a) CV curves at  $10 \text{ mV} \cdot \text{s}^{-1}$ ; (b) GCD profiles at  $1 \text{ A} \cdot \text{g}^{-1}$ .

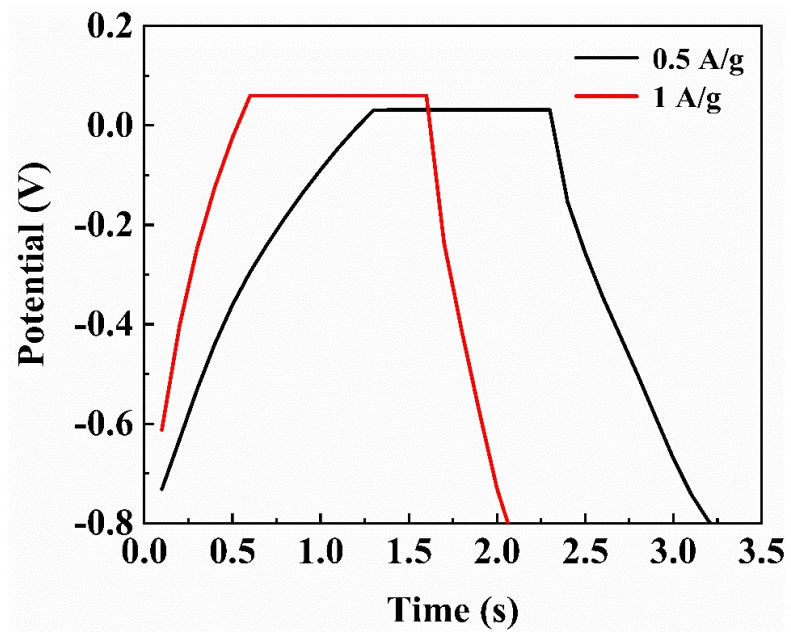

**Figure S6.** The GCD curves with ash as the electrode materials.

## References

- 1 A. Khan, R. A. Senthil, J. Pan, S. Osman, Y. Sun and X. Shu, *Electrochim. Acta*, 2020, 335, 135588.
- 2 X. L. Su, J. R. Chen, G. P. Zheng, J. H. Yang, X. X. Guan, P. Liu and X. C. Zheng, *Appl. Surf. Sci.*, 2018, 436, 327–336.
- 3 L. Sun, C. Tian, M. Li, X. Meng, L. Wang, R. Wang, J. Yin and H. Fu, *J. Mater. Chem. A*, 2013, 1, 6462–6470.
- 4 I. I. Misnon, N. K. M. Zain and R. Jose, *Waste and Biomass Valorization*, 2019, 10, 1731–1740.
- 5 F. Yu, Z. Ye, W. Chen, Q. Wang, H. Wang, H. Zhang and C. Peng, *Appl. Surf. Sci.*, 2020, 507, 145190.
- 6 G. Lin, R. Ma, Y. Zhou, Q. Liu, X. Dong and J. Wang, *Electrochim. Acta*, 2018, 261, 49–57.
- 7 F. Wu, J. Gao, X. Zhai, M. Xie, Y. Sun, H. Kang, Q. Tian and H. Qiu, *Carbon N. Y.*, 2019, 147, 242–251.
- 8 H. Jia, J. Sun, X. Xie, K. Yin and L. Sun, *Carbon N. Y.*, 2019, 143, 309–317.
- 9 C. Chen, D. Yu, G. Zhao, B. Du, W. Tang, L. Sun, Y. Sun, F. Besenbacher and M. Yu, *Nano Energy*, 2016, 27, 377–389.
- 10 S. Liu, Y. Zhao, B. Zhang, H. Xia, J. Zhou, W. Xie and H. Li, *J. Power Sources*, 2018, 381, 116–126.
- 11 J. Cao, C. Zhu, Y. Aoki and H. Habazaki, *ACS Sustain. Chem. Eng.*, 2018, 6, 7292–7303.
- 12 D. Khalafallah, X. Quan, C. Ouyang, M. Zhi and Z. Hong, *Renew. Energy*, 2021, 170, 60–71.
- 13 X. Chen, K. Wu, B. Gao, Q. Xiao, J. Kong, Q. Xiong, X. Peng, X. Zhang and J. Fu, *Waste and Biomass Valorization*, 2016, 7, 551–557.
